# Supplementary material for: Anticancer Activity of Novel Plant Extracts and Compounds from Adenosma bracteosum (Bonati) in Human Lung and Liver Cancer Cells
Source: PubMed Central journal article supplement (PMC7356985; doi:10.3390/molecules25122912), 2020-06-24
Supplement: molecules-25-02912-s001.pdf [file molecules-25-02912-s001.pdf]

Article

# Anticancer Activity of Novel Plant Extracts and Compounds from *Adenosma bracteosum* (Bonati) in Human Lung and Liver Cancer Cells

Ngoc Hong Nguyen <sup>1</sup>, Qui Thanh Hoai Ta <sup>2</sup>, Quang Thang Pham <sup>3</sup>, Thi Ngoc Han Luong <sup>3</sup>, Van Trung Phung <sup>4</sup>, Thuc-Huy Duong <sup>5</sup> and Van Giau Vo <sup>6,7,\*</sup>

<sup>1</sup> CirTech Institute, Ho Chi Minh City University of Technology (HUTECH), Ho Chi Minh City 700000, Vietnam, nn.hong@hutech.edu.vn

<sup>2</sup> Institute of Research and Development, Duy Tan University, Danang 550000, Vietnam, tathoaiqui@duytan.edu.vn

<sup>3</sup> Institute of Applied Science, Ho Chi Minh City University of Technology (HUTECH), Ho Chi Minh City 700000, Vietnam, pquangthang1@gmail.com (Q.T.P.); ngochanlt96@gmail.com (T.N.H.L.)

<sup>4</sup> Center for Research and Technology Transfer, Vietnam Academy of Science and Technology, Hanoi 100000, Vietnam, pvtrung@ict.vast.vn

<sup>5</sup> Department of Organic Chemistry, University of Education, Ho Chi Minh City 700000, Vietnam, huydt@hcmue.edu.vn

<sup>6</sup> Bionanotechnology Research Group, Ton Duc Thang University, Ho Chi Minh City 700000, Vietnam

<sup>7</sup> Faculty of Pharmacy, Ton Duc Thang University, Ho Chi Minh City 700000, Vietnam

\* Correspondence: vovangiau@tdtu.edu.vn

Academic Editors: José Antonio Lupiáñez, Amalia Pérez-Jiménez and Eva E. Rufino-Palomares

Received: 30 May 2020; Accepted: 16 June 2020; Published: date

## Supplement Information

Table S1. NMR spectral data of AB1 and AB2 compounds.

| AB1                |                    |                                                                                   | AB2                                                                                |            |
|--------------------|--------------------|-----------------------------------------------------------------------------------|------------------------------------------------------------------------------------|------------|
|                    |                    | 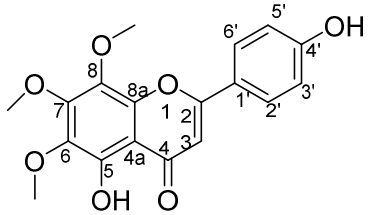 |  |            |
| N                  | $\delta_H, J$ (Hz) | $\delta_C$                                                                        | $\delta_H, J$ (Hz)                                                                 | $\delta_C$ |
| 2                  |                    | 164.3                                                                             |                                                                                    | 164.4      |
| 3                  | 6.60 (s)           | 102.8                                                                             | 6.75 (s)                                                                           | 103.0      |
| 4                  |                    | 183.1                                                                             |                                                                                    | 183.0      |
| 4a                 |                    | 106.7                                                                             |                                                                                    | 106.7      |
| 5                  |                    | 161.8                                                                             |                                                                                    | 161.8      |
| 6                  |                    | 133.0                                                                             |                                                                                    | 133.0      |
| 7                  |                    | 152.0                                                                             |                                                                                    | 152.0      |
| 8                  |                    | 136.0                                                                             |                                                                                    | 136.0      |
| 8a                 |                    | 149.0                                                                             |                                                                                    | 148.0      |
| 5-OH               |                    |                                                                                   |                                                                                    |            |
| 7-OCH <sub>3</sub> | 4.09 (s)           | 61.4                                                                              | 4.09 (s)                                                                           | 61.4       |
| 6-OCH <sub>3</sub> | 3.97 (s)           | 61.0                                                                              | 3.97 (s)                                                                           | 61.0       |
| 8-OCH <sub>3</sub> | 3.90 (s)           | 60.1                                                                              | 3.90 (s)                                                                           | 60.1       |
| 1'                 |                    | 122.3                                                                             |                                                                                    | 122.4      |

|                     |                        |       |                              |       |
|---------------------|------------------------|-------|------------------------------|-------|
| 2'                  | 7.85 ( <i>d</i> , 8.0) | 128.5 | 7.66 ( <i>dd</i> , 8.0, 1.5) | 120.6 |
| 3'                  | 6.94 ( <i>d</i> , 8.0) | 116.1 | 7.04 ( <i>d</i> , 8.0)       | 115.6 |
| 4'                  |                        | 161.3 |                              | 151.0 |
| 5'                  | 6.94 ( <i>d</i> , 8.0) | 116.1 |                              | 145.7 |
| 6'                  | 7.85 ( <i>d</i> , 8.0) | 128.5 | 7.65 ( <i>brs</i> )          | 109.6 |
| 3'-OCH <sub>3</sub> |                        |       | 3.88 ( <i>s</i> )            | 55.6  |

Table S2. Compare AB3 compound spectral data and reference.

| N (H) <sup>1</sup> H-NMR |                             |                                              |
|--------------------------|-----------------------------|----------------------------------------------|
|                          | AB3                         | Ursolic acid ((Harmand <i>et al.</i> , 2003) |
| 1                        |                             | 1.56 (2H, m)                                 |
| 2                        |                             | 1.43 (2H, m)                                 |
| 3                        | 3.00 (1H, td, J = 6.8; 9.9) | 3.01 (1H, dd, J = 5.2; 9.5)                  |
| 4                        |                             |                                              |
| 5                        | 0.66 (1H, d, J = 11.3)      | 0.66 (1H, s)                                 |
| 6                        | 1.99 (1H, dd, J = 4.1;13.4) | 1.47 (1H, m, H-6a)<br>1.29 (1H, m, H-6b)     |
| 7                        |                             | 1.27 (2H, m)                                 |
| 8                        |                             |                                              |
| 9                        |                             | 1.58 (1H, s)                                 |
| 10                       |                             |                                              |
| 11                       |                             | 1.92 (2H, dd, J = 13.7; 3.5)                 |
| 12                       | 5.14 (1H, td, J = 3.4; 6.8) | 5.14 (1H, dd, J = 13.7; 3.5)                 |
| 13                       |                             |                                              |
| 14                       |                             |                                              |
| 15                       |                             | 1.01 (2H, m)                                 |
| 16                       |                             | 1.53 (2H, m)                                 |
| 17                       |                             |                                              |

|    |                        |                        |
|----|------------------------|------------------------|
| 18 | 2.11 (1H, d, J = 13.1) | 2.12 (1H, d; J = 11.1) |
| 19 |                        | 1.31 (1H, m)           |
| 20 |                        | 1.52 (1H, m)           |
| 21 |                        | 1.29 (2H, m)           |
| 22 |                        | 1.54 (2H, m)           |
| 23 | 0.94 (3H, d, J = 6.2)  | 0.90 (3H, s)           |
| 24 | 0.77 (3H, s)           | 0.68 (3H, s)           |
| 25 | 0.90 (3H, d, J = 4.2)  | 0.87 (3H, s)           |
| 26 | 0,81 (3H, s)           | 0.69 (3H, s)           |
| 27 | 1.08 (3H, s)           | 1.05 (3H, s)           |
| 28 |                        |                        |
| 29 | 0.85 (3H, d, J = 6.4)  | 0.82 (3H, d, J = 5.9)  |
| 30 | 0.92 (3H, s)           | 0.92 (3H, d, J = 6.8)  |

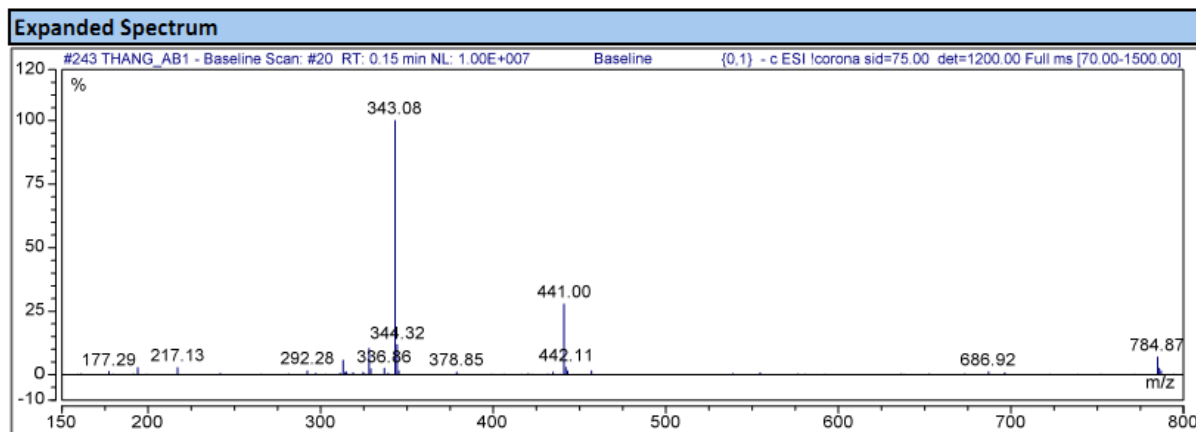

Figure S1. ESI mass spectrum of AB1.

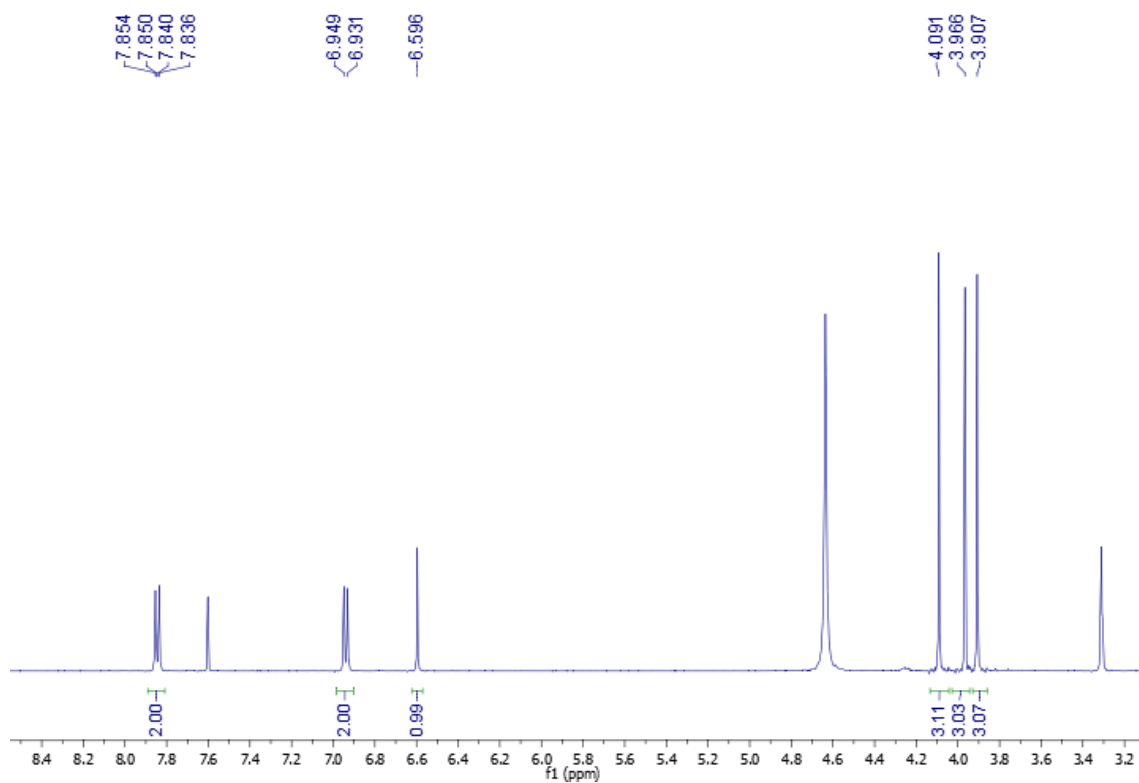Figure S2. The  $^1\text{H}$  NMR spectrum of AB1 in methanol- $d_4$ .

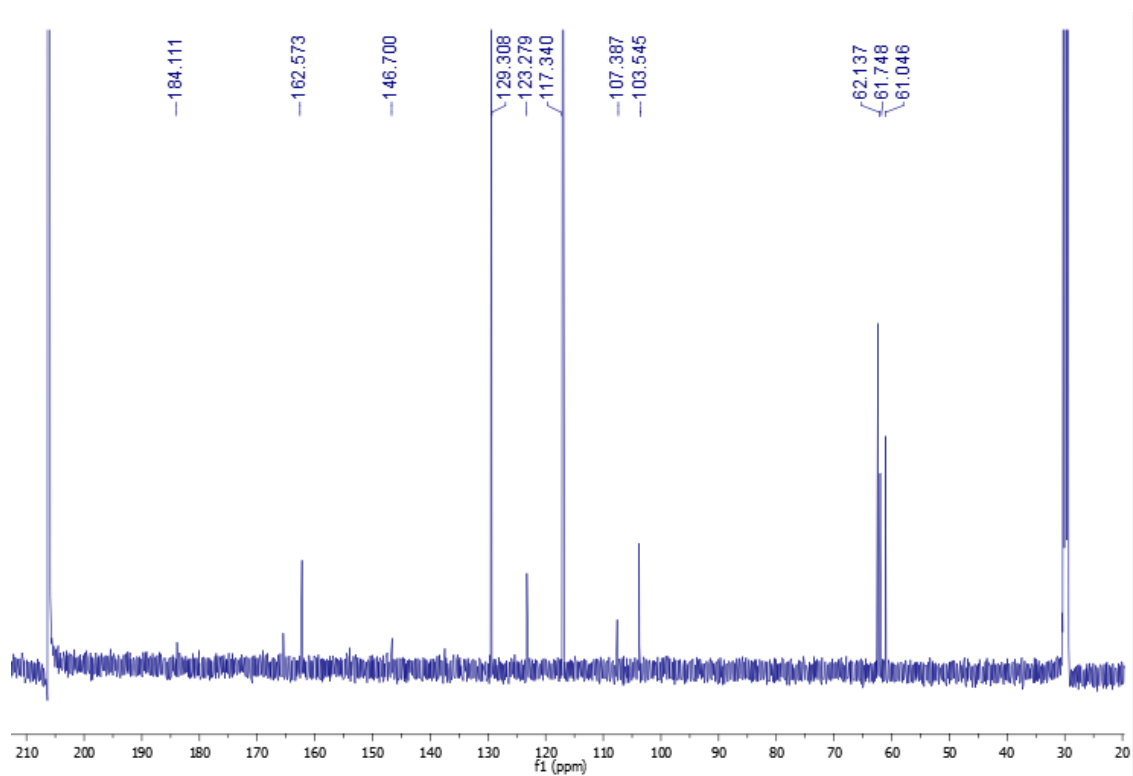

Figure S3. The  $^{13}\text{C}$  NMR spectrum of AB1 in acetone- $d_6$ .

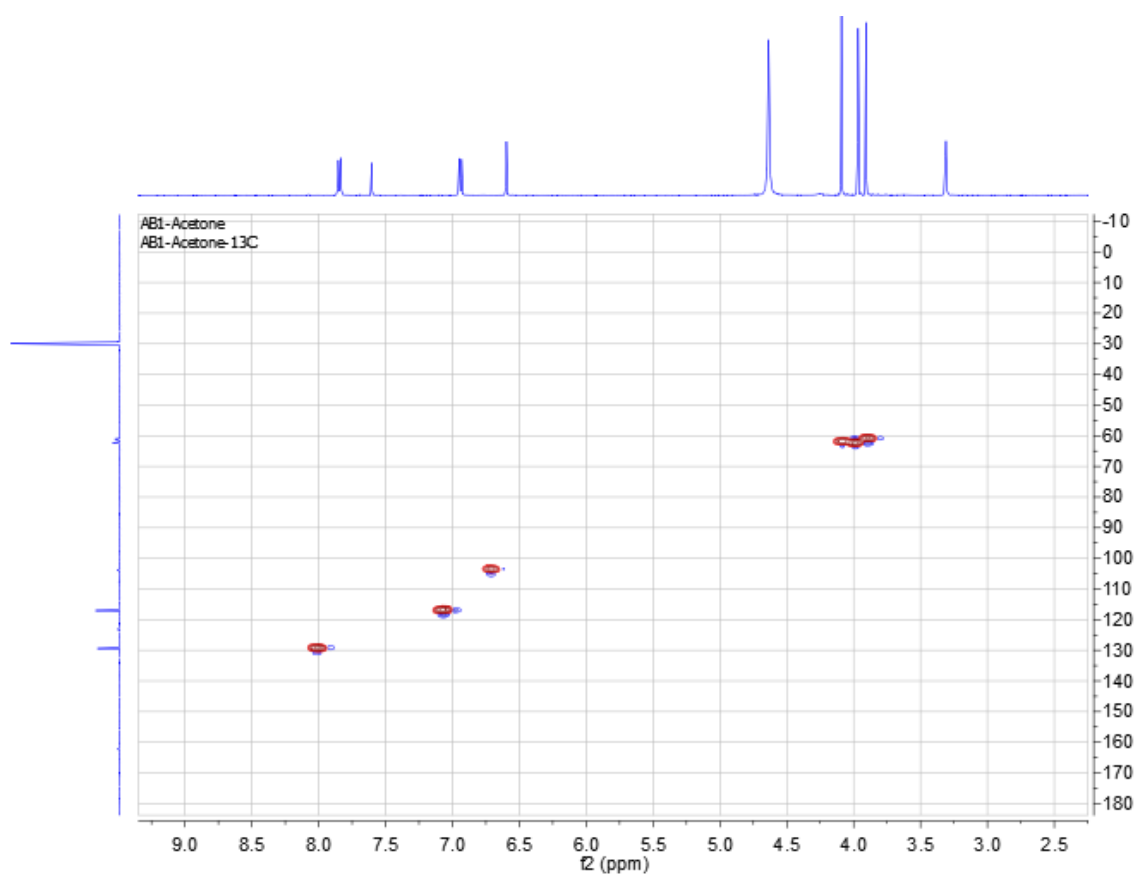

Figure S4. HSQC spectrum of AB1 in acetone- $d_6$ .

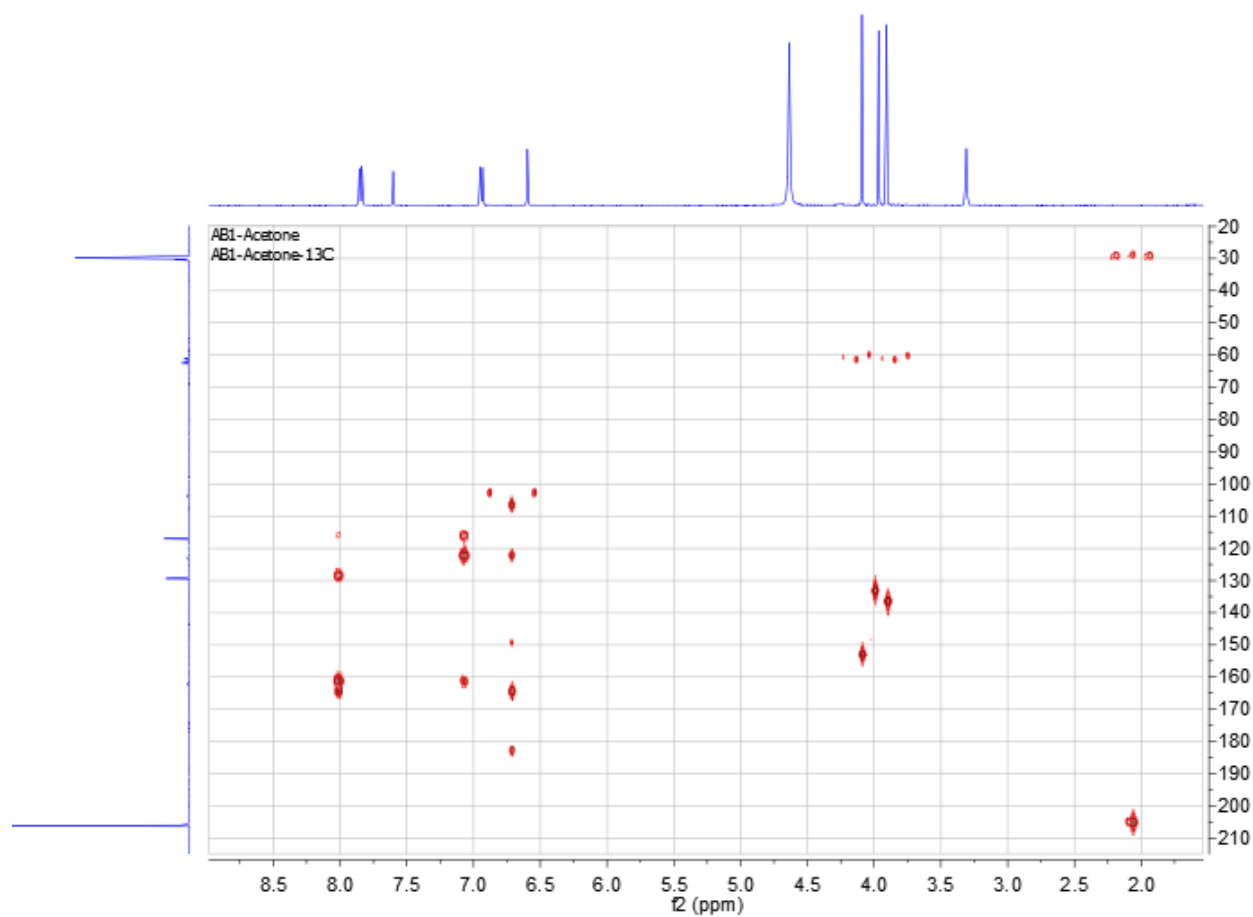

Figure S5. HMBC spectrum of AB1 in Acetone- $d_6$ .

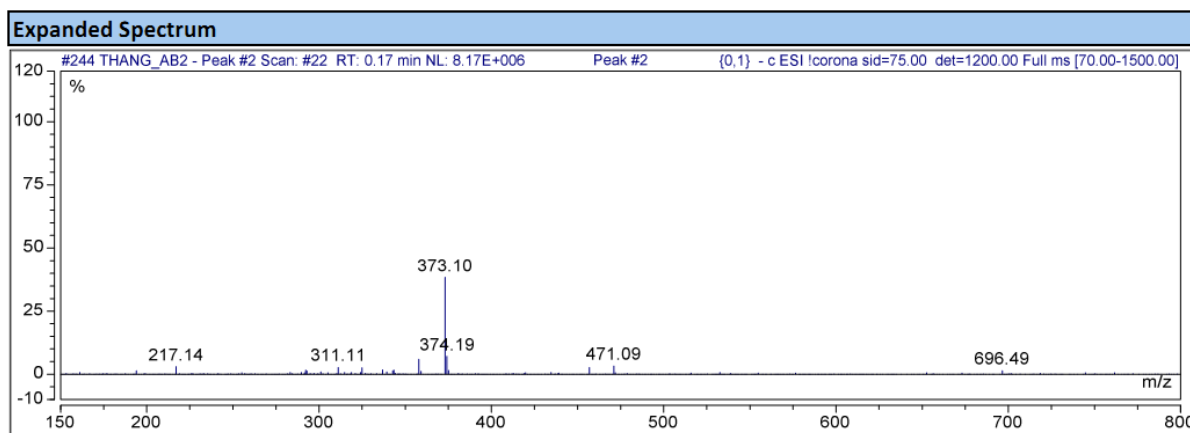

Figure S6. EI mass spectrum of AB2.



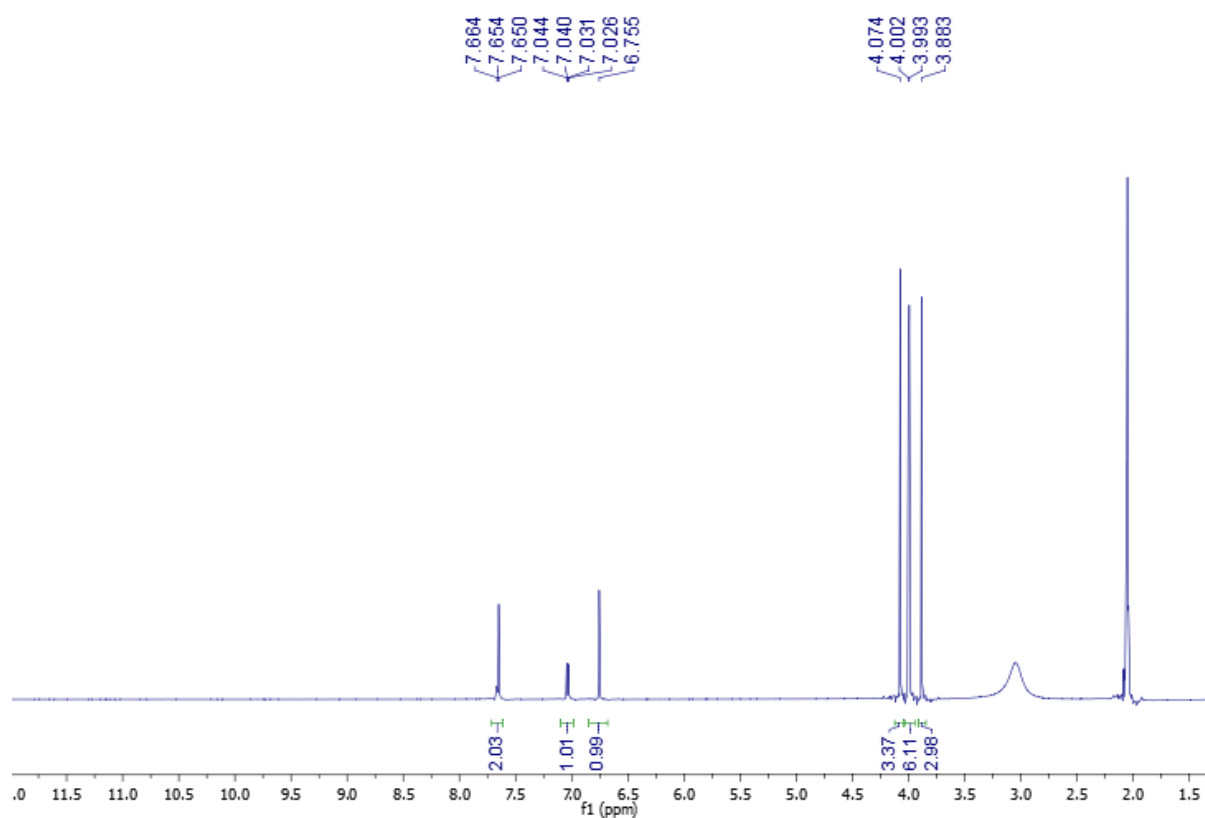

Figure S7. The  $^1\text{H}$  NMR spectrum of AB2 in acetone- $d_6$ .

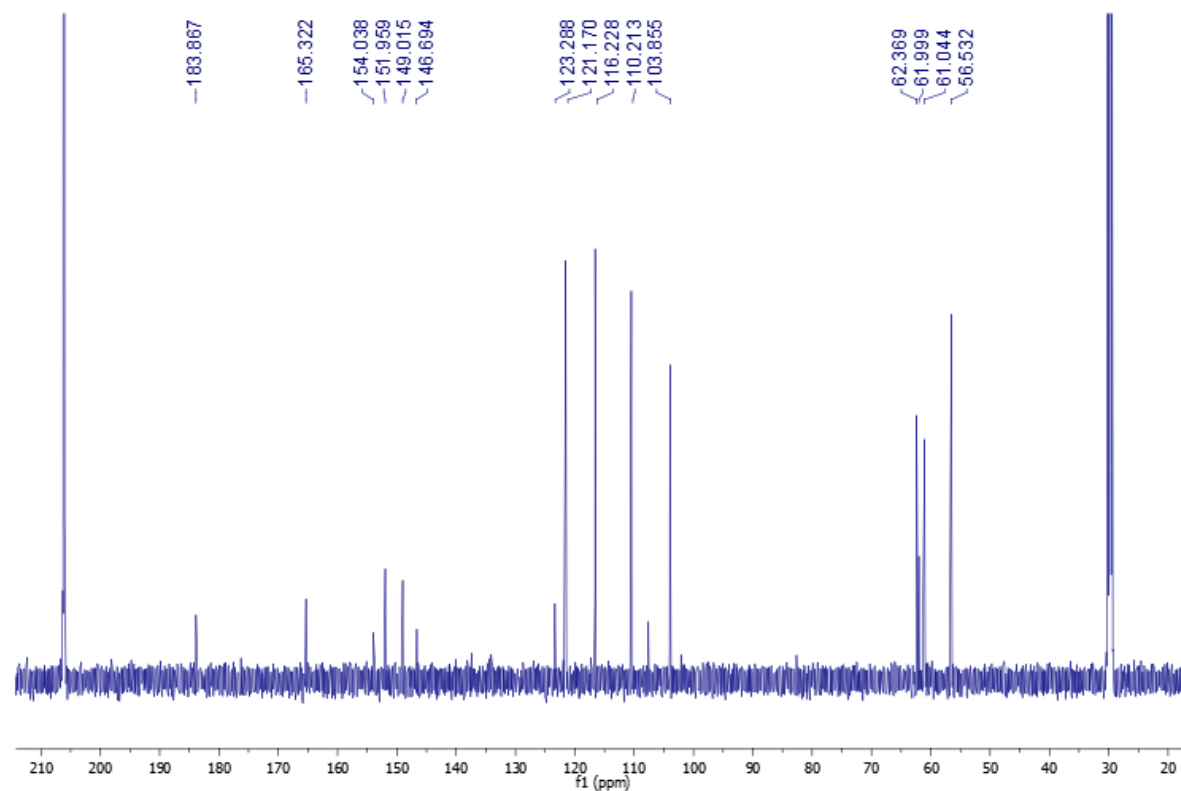

Figure S8. The  $^{13}\text{C}$  NMR spectrum of AB2 in acetone- $d_6$ .

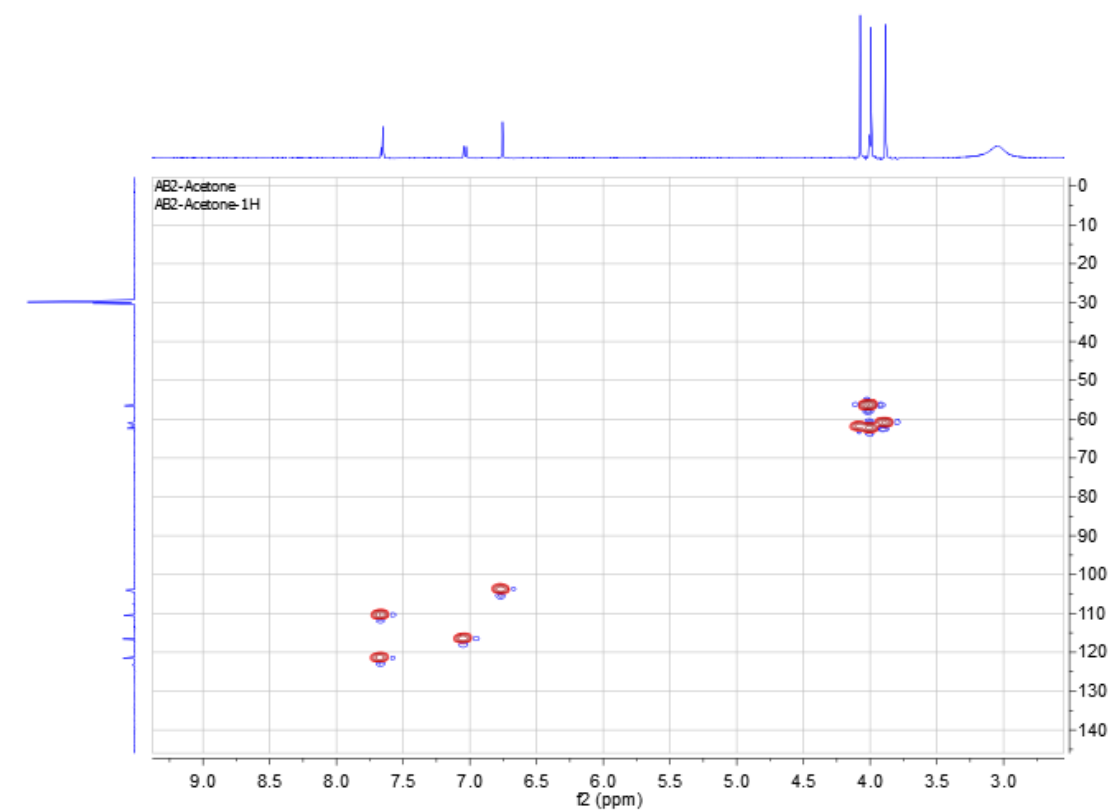

Figure S9. HSQC spectrum of AB2 in acetone-*d*<sub>6</sub>.

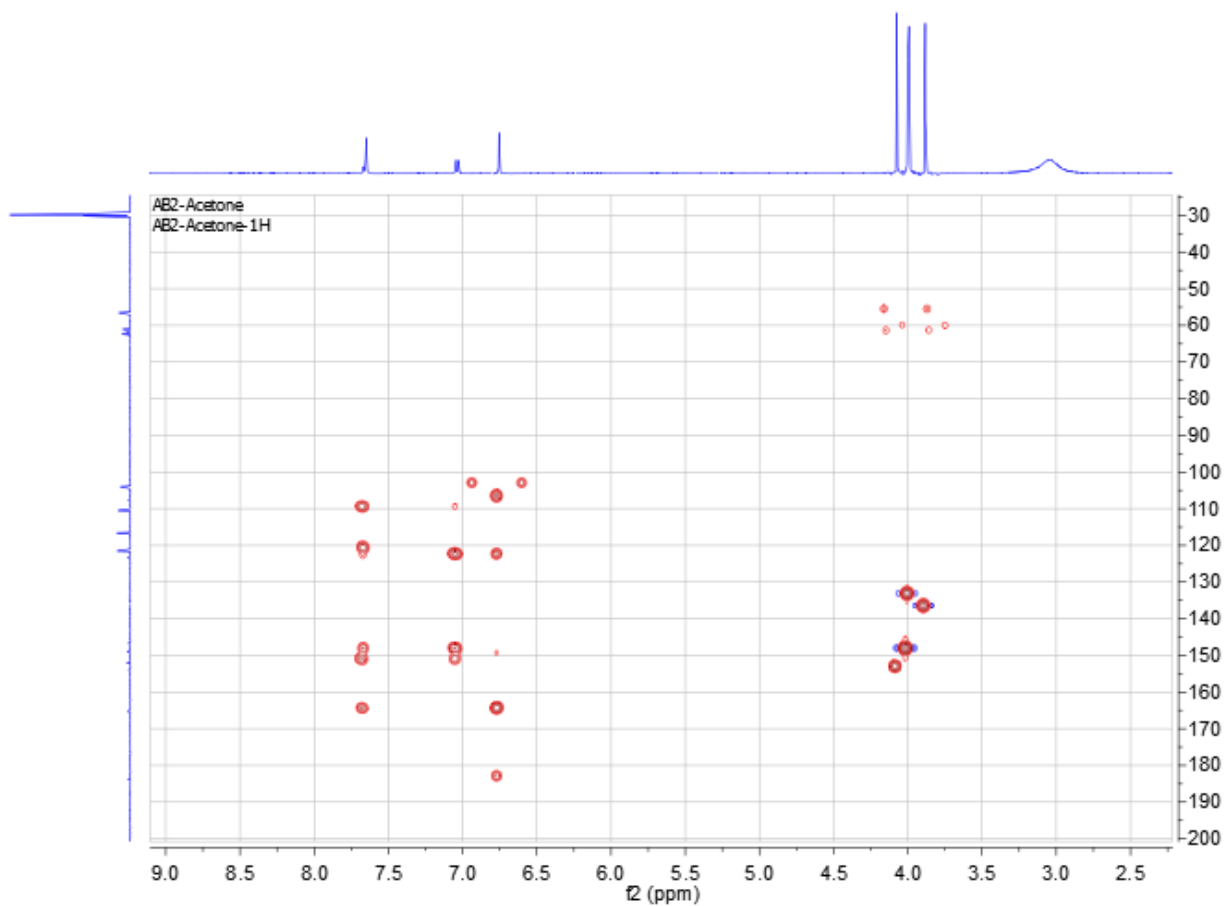

**Figure S10.** HMBC spectrum of **AB2** in Acetone-*d*<sub>6</sub>.

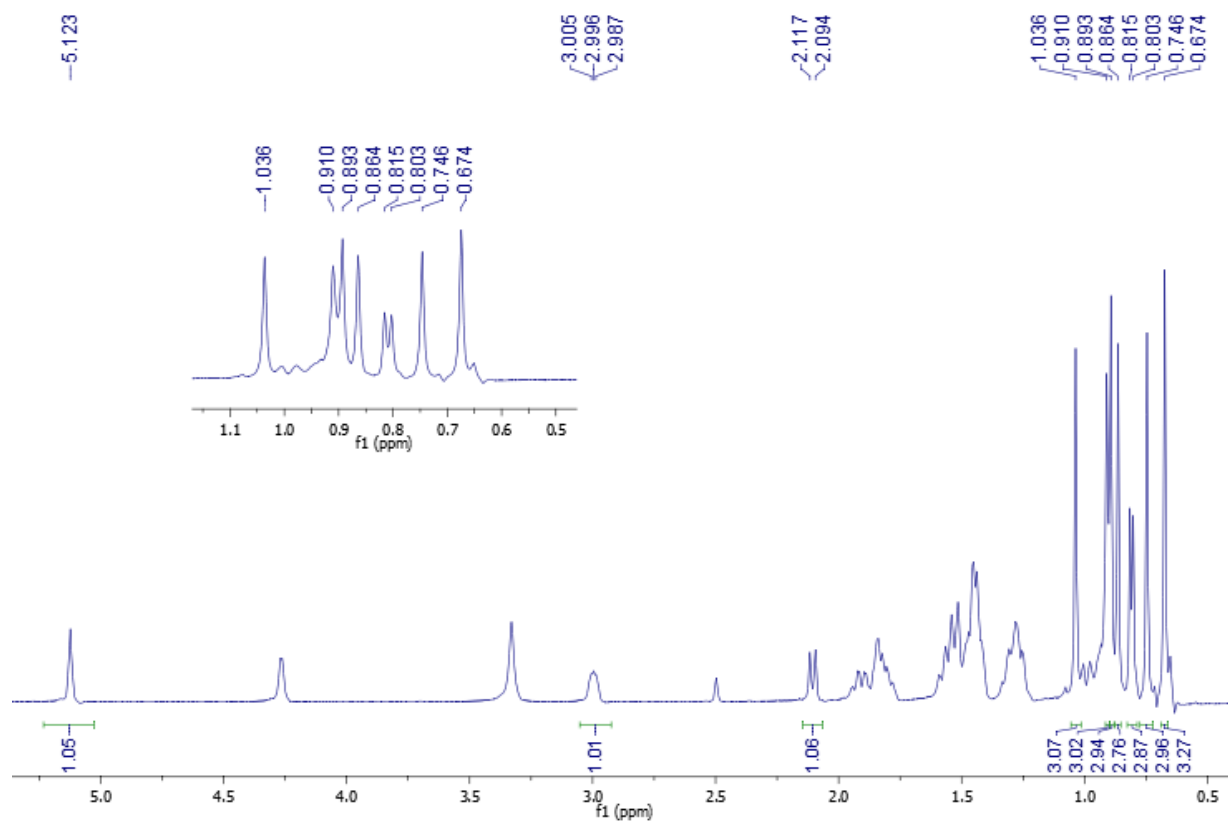

Figure S11. The  $^1\text{H}$  NMR spectrum of AB3 in  $\text{DMSO-}d_6$ .

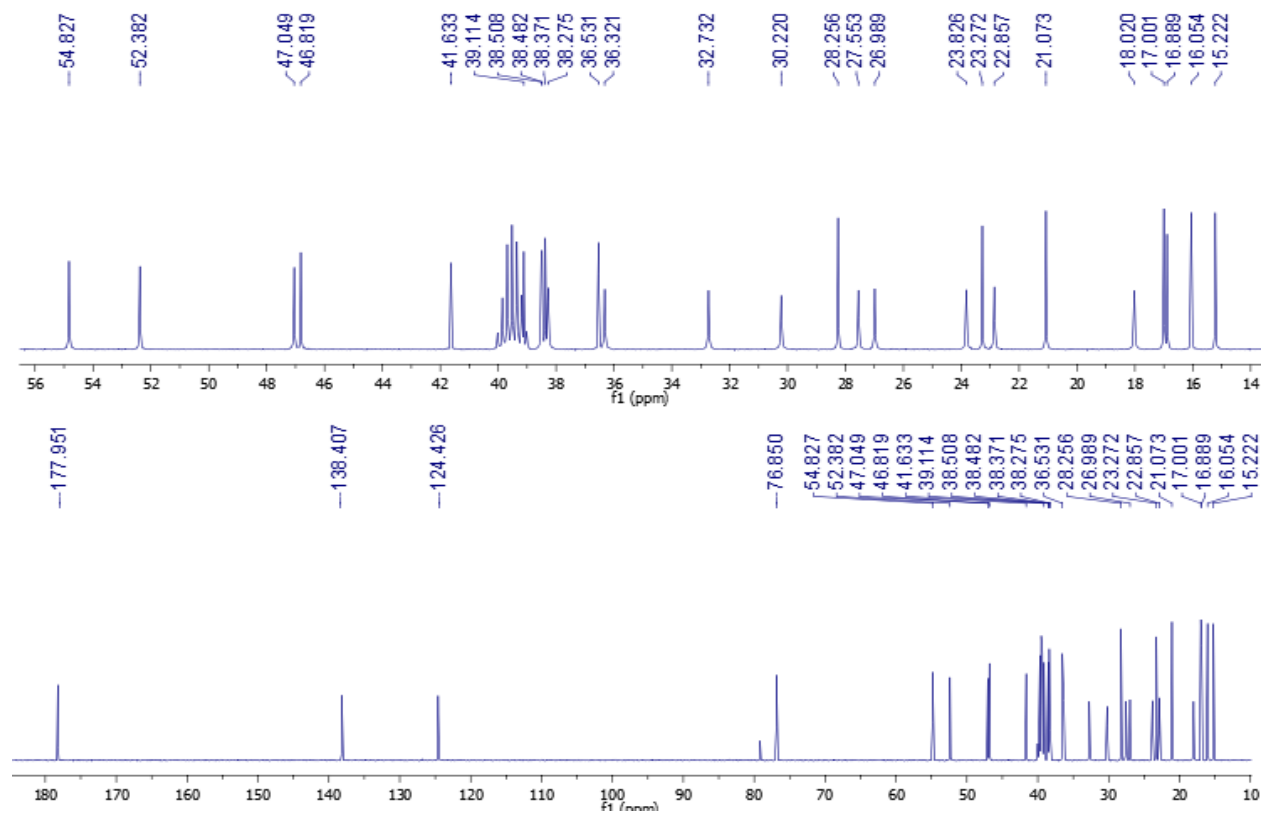

Figure S12. The <sup>13</sup>C NMR spectrum of AB3 in DMSO-*d*<sub>6</sub>.
